# Supplementary material for: La formation et la recherche: pistes bibliographiques
Source: Royal Society of Chemistry journal article supplement (doi:10.1039/d1ob00464f), 2008-01-01

## Supporting information

### **Ag(I)-catalyzed rapid access to 2-amino-4-methylenethiazolines with potential application in bioconjugation chemistry**

Lingling Xiang,<sup>‡</sup> Haiting Wu,<sup>‡</sup> Yunshi Liang,<sup>‡</sup> Huiying Deng, Yiting He, Qin Xu,\* Jing Zhang\*

Artemisinin Research Center & The First Affiliated Hospital, Guangzhou University of Chinese Medicine, 12 Jichang Road, Guangzhou 510405, China.

Email: jingzhang@gzucm.edu.cn; xuqin@gzucm.edu.cn

<sup>‡</sup> These authors contributed equally to this work

## Table of Contents

1. X-ray crystal structure analysis
2. <sup>1</sup>H, <sup>13</sup>C NMR and <sup>19</sup>F NMR spectra of compounds

## 1. X-ray crystal structure analysis

The crystallographic data for compounds **2a** and **3e** have been deposited in Cambridge Crystallographic Data Centre (CCDC) with deposition Numbers of 2068592 and 2068587, respectively. These data can be obtained free of charge from CCDC via <https://www.ccdc.cam.ac.uk/structures/>.

Table S1 Crystal data and structure refinement for compound **2a**.

|                                             |                                                               |
|---------------------------------------------|---------------------------------------------------------------|
| Identification code                         | 2a                                                            |
| Empirical formula                           | C <sub>10</sub> H <sub>10</sub> N <sub>2</sub> S              |
| Formula weight                              | 190.26                                                        |
| Temperature/K                               | 190.0                                                         |
| Crystal system                              | triclinic                                                     |
| Space group                                 | P-1                                                           |
| a/Å                                         | 8.4613(5)                                                     |
| b/Å                                         | 11.5857(7)                                                    |
| c/Å                                         | 20.5398(13)                                                   |
| α/°                                         | 105.707(4)                                                    |
| β/°                                         | 100.475(4)                                                    |
| γ/°                                         | 90.015(4)                                                     |
| Volume/Å <sup>3</sup>                       | 1903.4(2)                                                     |
| Z                                           | 8                                                             |
| ρ <sub>calc</sub> /cm <sup>3</sup>          | 1.328                                                         |
| μ/mm <sup>-1</sup>                          | 1.720                                                         |
| F(000)                                      | 800.0                                                         |
| Crystal size/mm <sup>3</sup>                | 0.12 × 0.1 × 0.1                                              |
| Radiation                                   | GaKα (λ = 1.34139)                                            |
| 2θ range for data collection/°              | 3.96 to 121.466                                               |
| Index ranges                                | -10 ≤ h ≤ 10, -15 ≤ k ≤ 14, -26 ≤ l ≤ 26                      |
| Reflections collected                       | 23108                                                         |
| Independent reflections                     | 8548 [R <sub>int</sub> = 0.0761, R <sub>sigma</sub> = 0.1039] |
| Data/restraints/parameters                  | 8548/0/469                                                    |
| Goodness-of-fit on F <sup>2</sup>           | 1.045                                                         |
| Final R indexes [I ≥ 2σ (I)]                | R <sub>1</sub> = 0.0625, wR <sub>2</sub> = 0.1331             |
| Final R indexes [all data]                  | R <sub>1</sub> = 0.1374, wR <sub>2</sub> = 0.1614             |
| Largest diff. peak/hole / e Å <sup>-3</sup> | 0.41/-0.37                                                    |

Table S2 Crystal data and structure refinement for compound **3e**.

|                                             |                                                               |
|---------------------------------------------|---------------------------------------------------------------|
| Identification code                         | 3e                                                            |
| Empirical formula                           | C <sub>10</sub> H <sub>16</sub> N <sub>2</sub> S              |
| Formula weight                              | 196.31                                                        |
| Temperature/K                               | 190.0                                                         |
| Crystal system                              | monoclinic                                                    |
| Space group                                 | P2 <sub>1</sub> /c                                            |
| a/Å                                         | 16.845(2)                                                     |
| b/Å                                         | 7.2075(11)                                                    |
| c/Å                                         | 9.0263(13)                                                    |
| α/°                                         | 90                                                            |
| β/°                                         | 104.890(6)                                                    |
| γ/°                                         | 90                                                            |
| Volume/Å <sup>3</sup>                       | 1059.1(3)                                                     |
| Z                                           | 4                                                             |
| ρ <sub>calc</sub> /cm <sup>3</sup>          | 1.231                                                         |
| μ/mm <sup>-1</sup>                          | 1.547                                                         |
| F(000)                                      | 424.0                                                         |
| Crystal size/mm <sup>3</sup>                | 0.12 × 0.1 × 0.1                                              |
| Radiation                                   | GaKα (λ = 1.34139)                                            |
| 2θ range for data collection/°              | 11.682 to 123.988                                             |
| Index ranges                                | -18 ≤ h ≤ 21, -6 ≤ k ≤ 9, -11 ≤ l ≤ 8                         |
| Reflections collected                       | 7889                                                          |
| Independent reflections                     | 2450 [R <sub>int</sub> = 0.0445, R <sub>sigma</sub> = 0.0442] |
| Data/restraints/parameters                  | 2450/0/118                                                    |
| Goodness-of-fit on F <sup>2</sup>           | 1.121                                                         |
| Final R indexes [I ≥ 2σ (I)]                | R <sub>1</sub> = 0.0454, wR <sub>2</sub> = 0.1238             |
| Final R indexes [all data]                  | R <sub>1</sub> = 0.0536, wR <sub>2</sub> = 0.1306             |
| Largest diff. peak/hole / e Å <sup>-3</sup> | 0.28/-0.46                                                    |

## 2. $^1\text{H}$ and $^{13}\text{C}$ NMR spectra of compounds

7.29  
7.27  
7.27  
7.26  
7.25  
7.15  
7.15  
7.14  
7.13  
7.13  
7.07  
7.07  
7.05  
7.05  
5.19  
5.18  
5.17  
5.17  
5.11  
5.11  
5.10  
5.10  
5.10  
5.09  
4.55  
4.55  
4.54

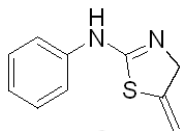

2a

Solvent:  $\text{CDCl}_3$

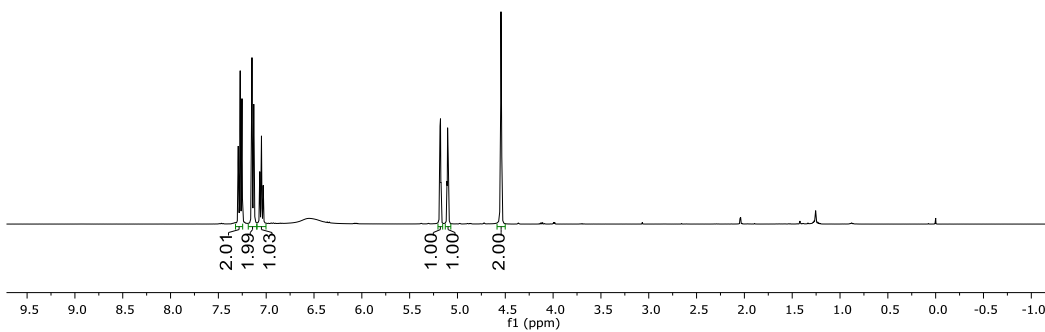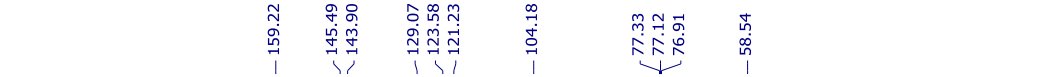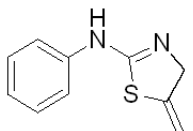

2a

Solvent:  $\text{CDCl}_3$

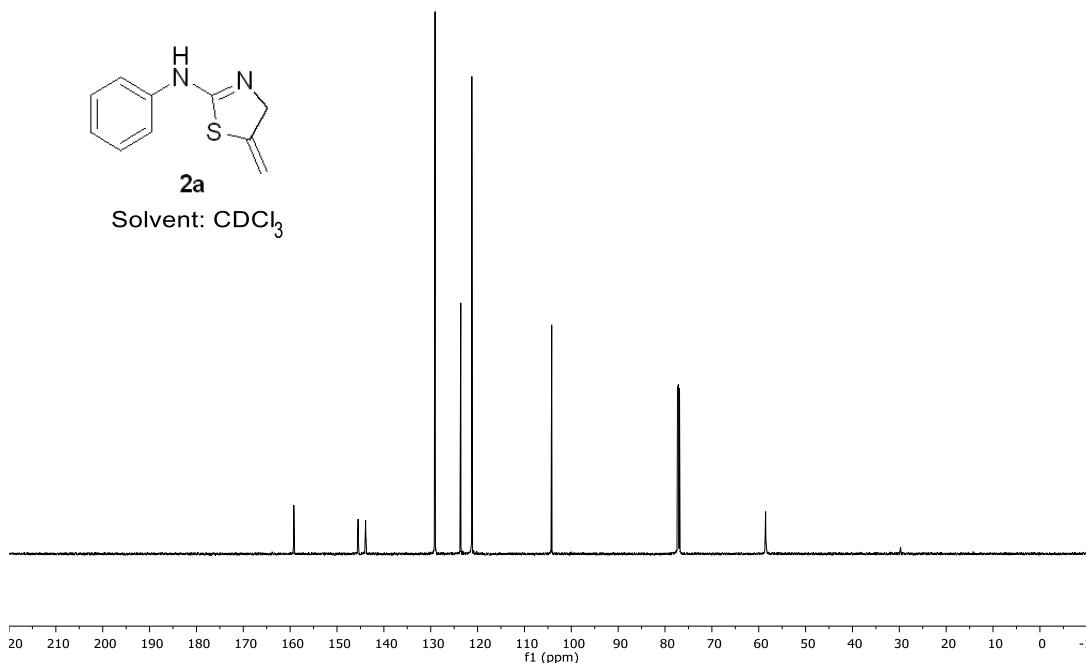

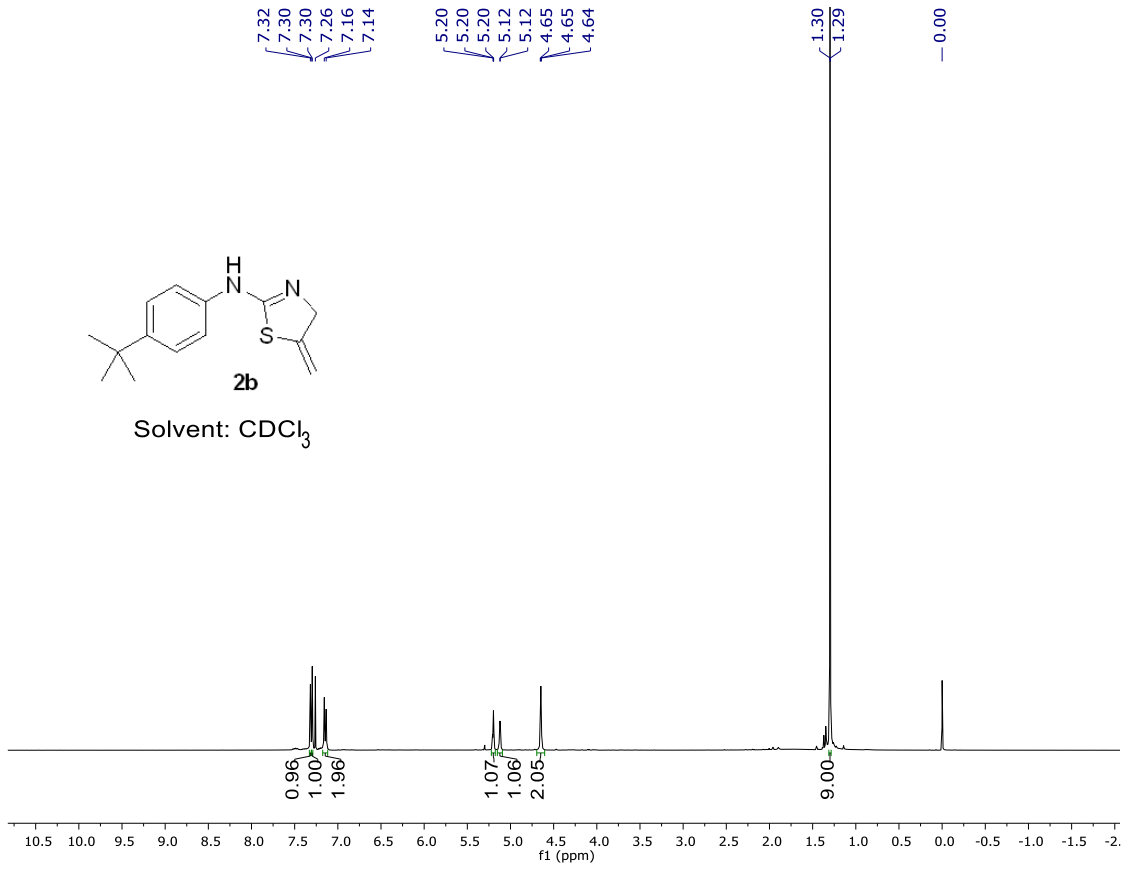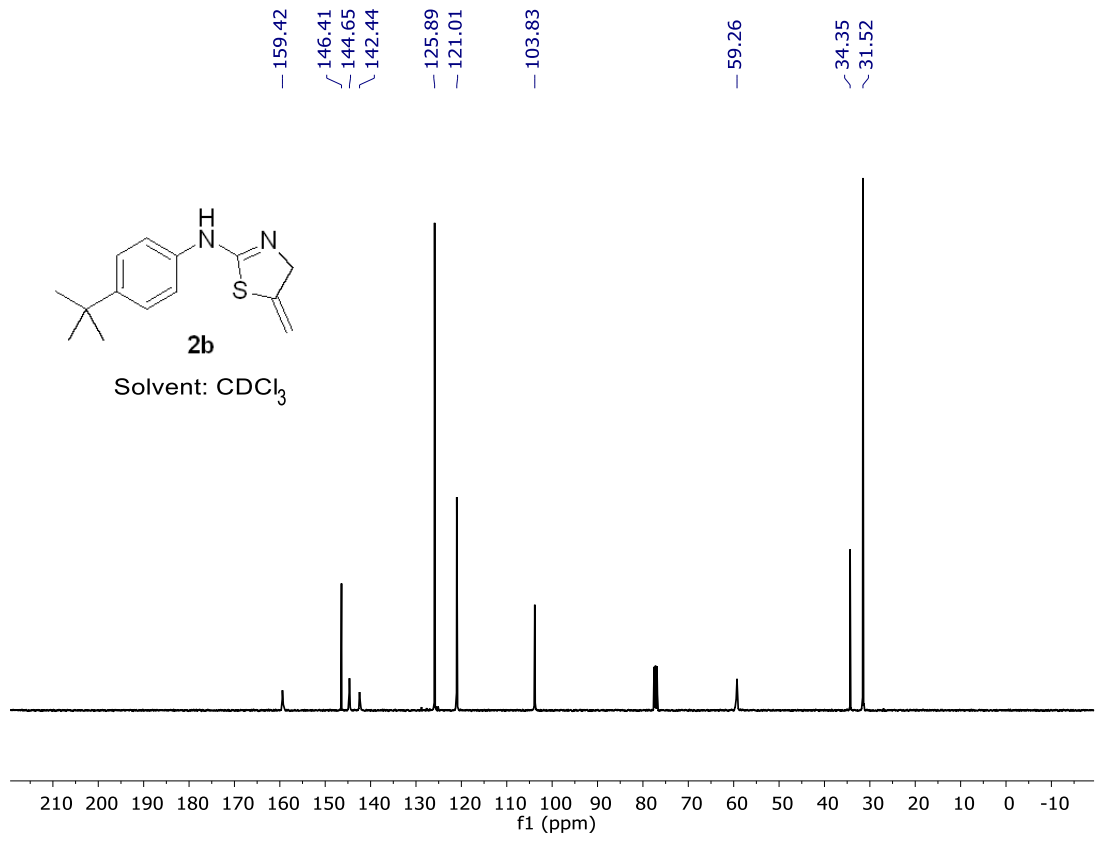

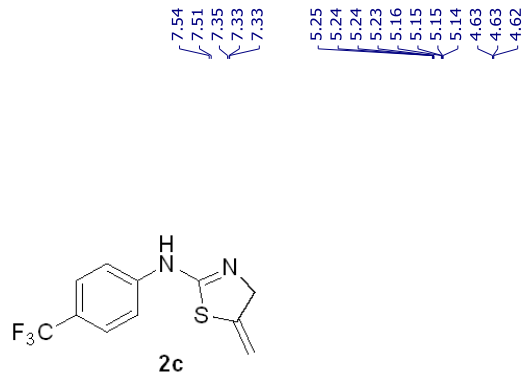

Solvent:  $\text{CDCl}_3$  (major) +  $\text{CD}_3\text{OD}$  (minor)

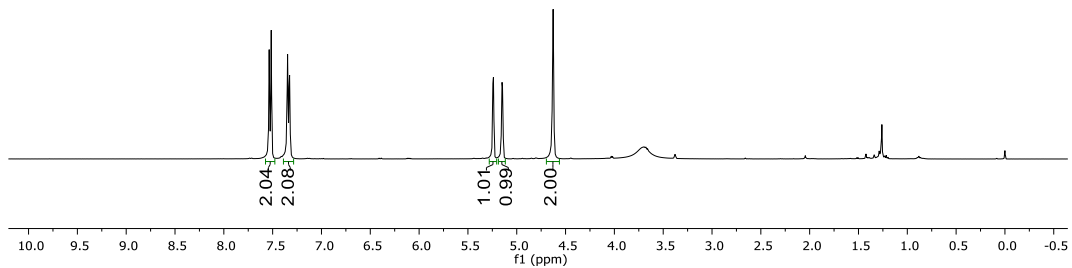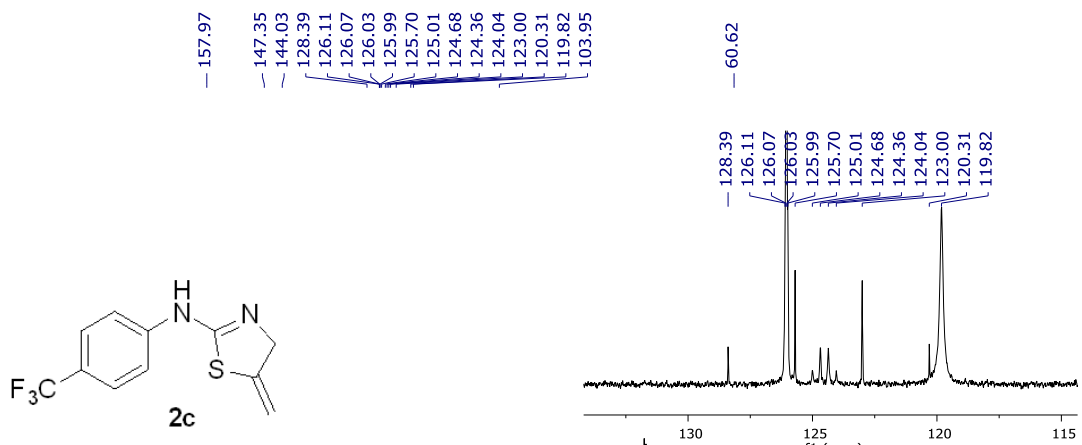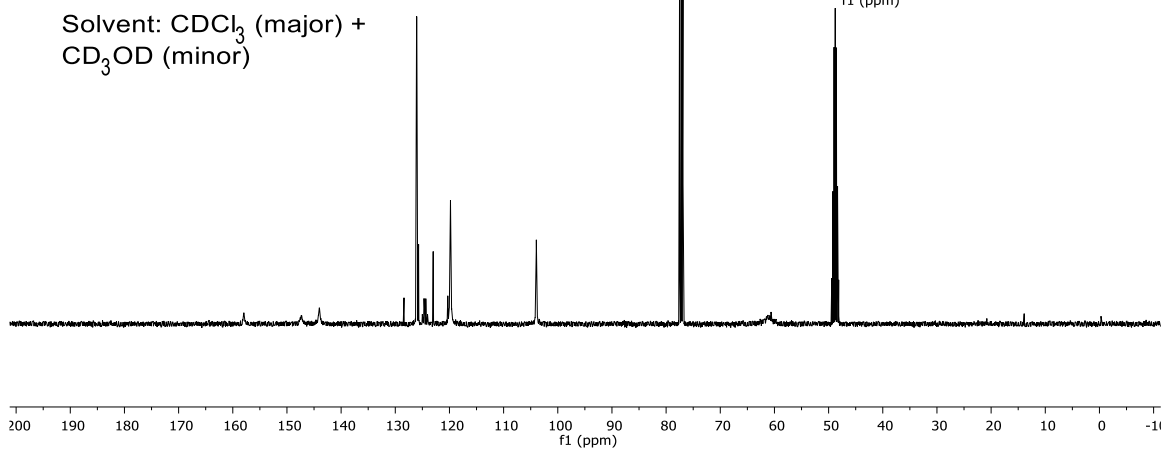

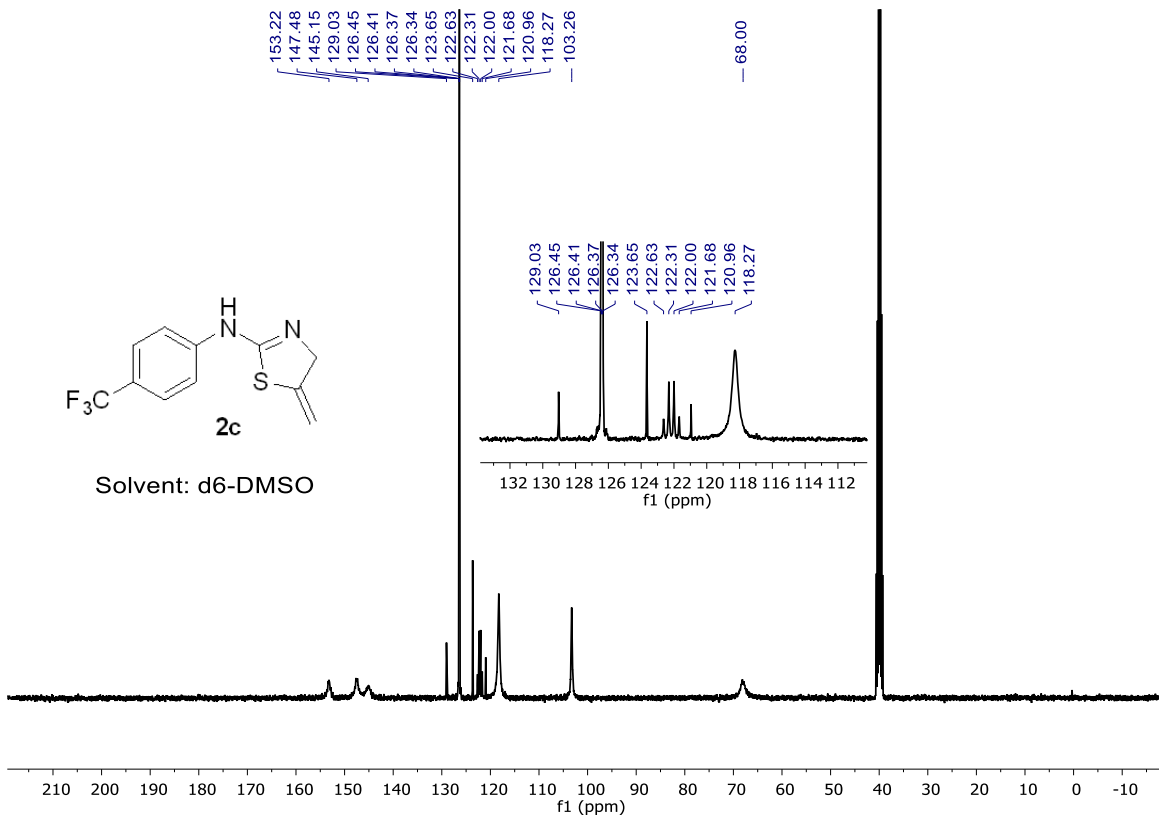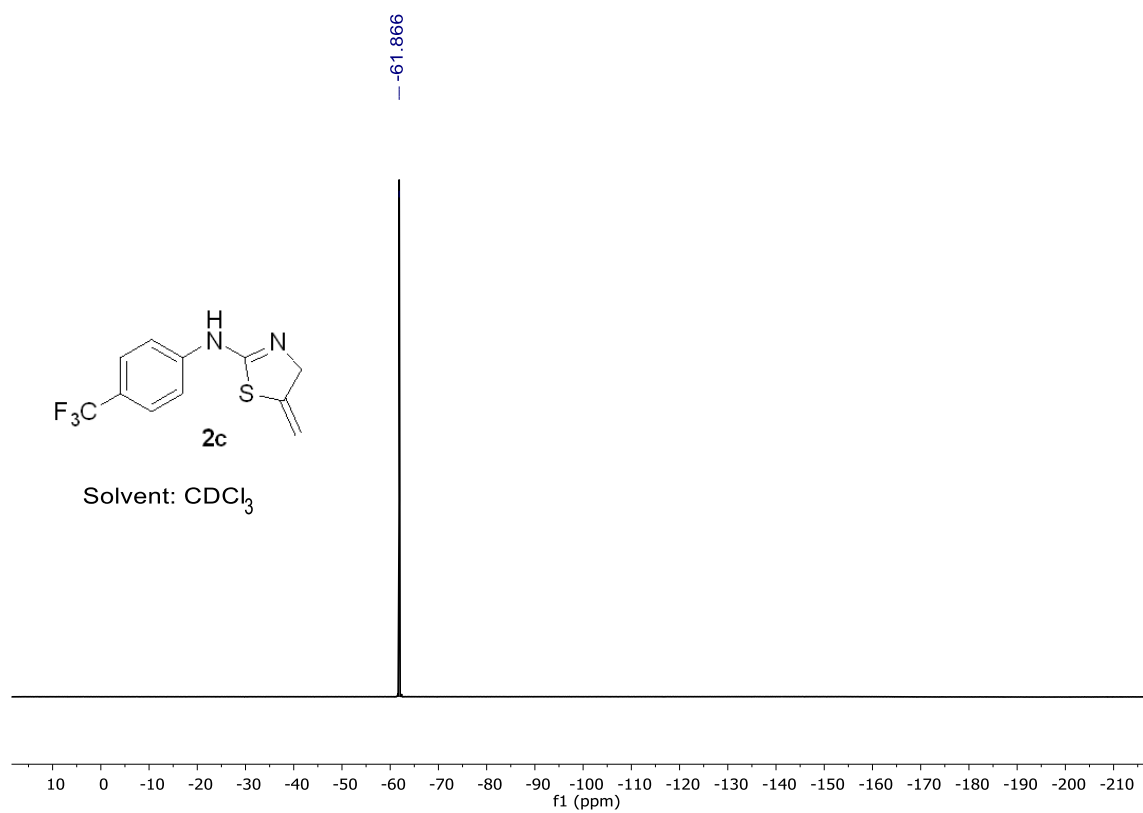

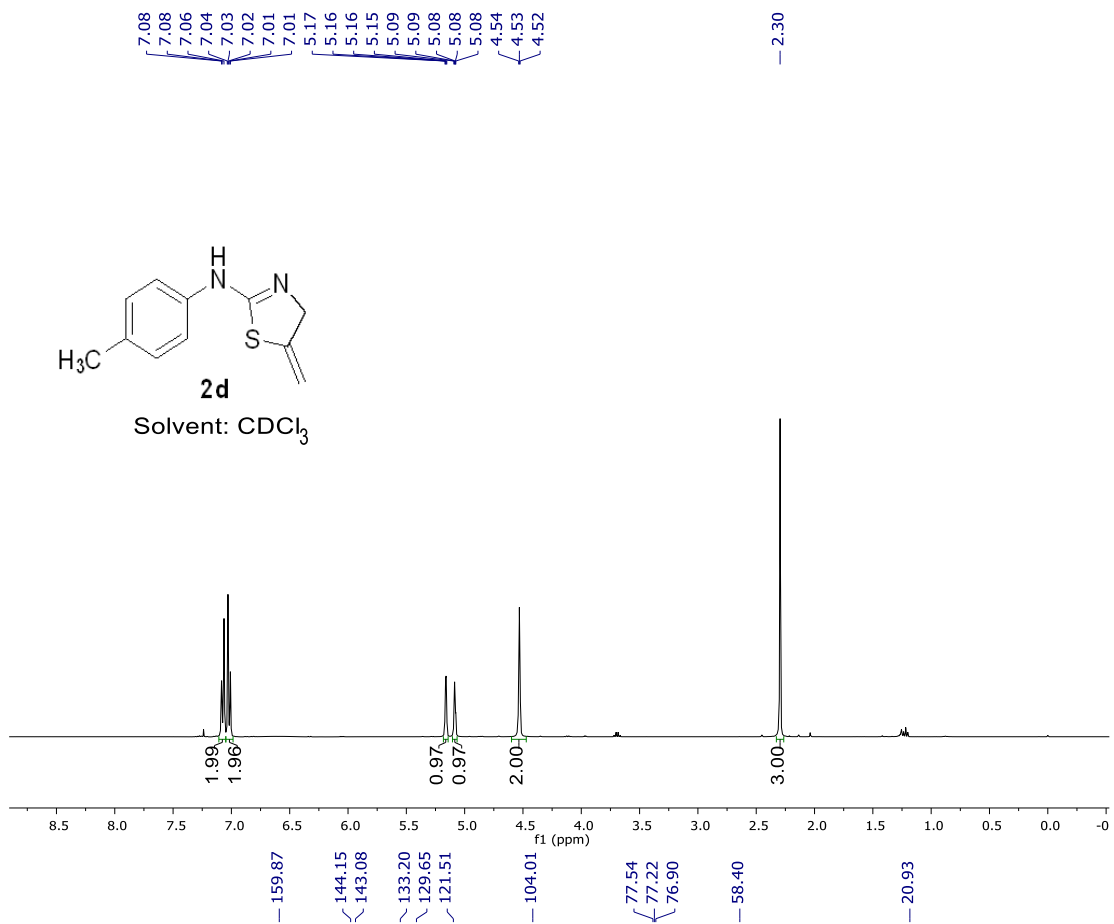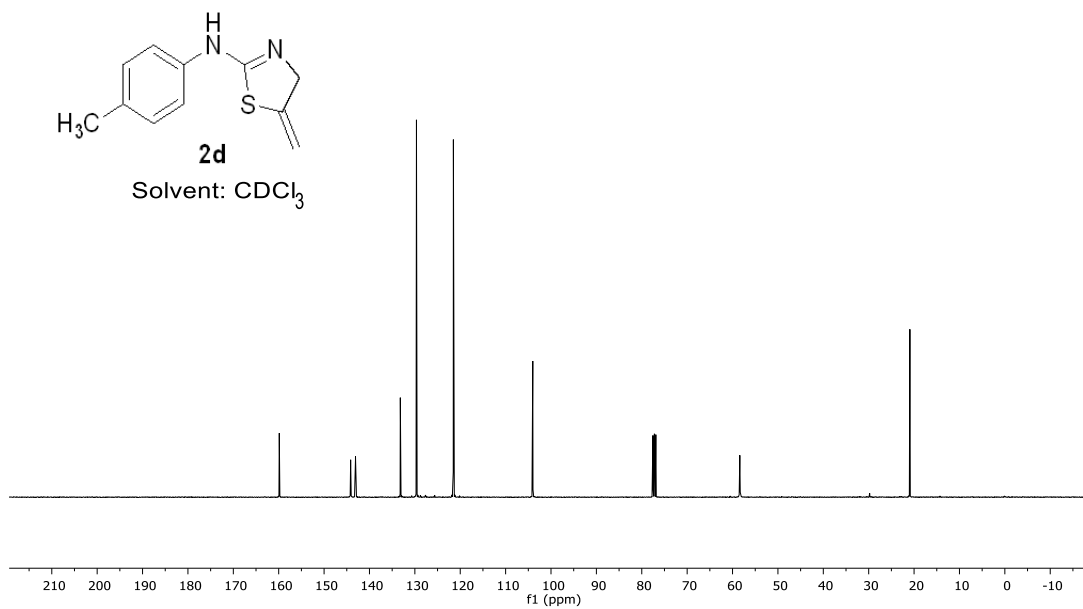



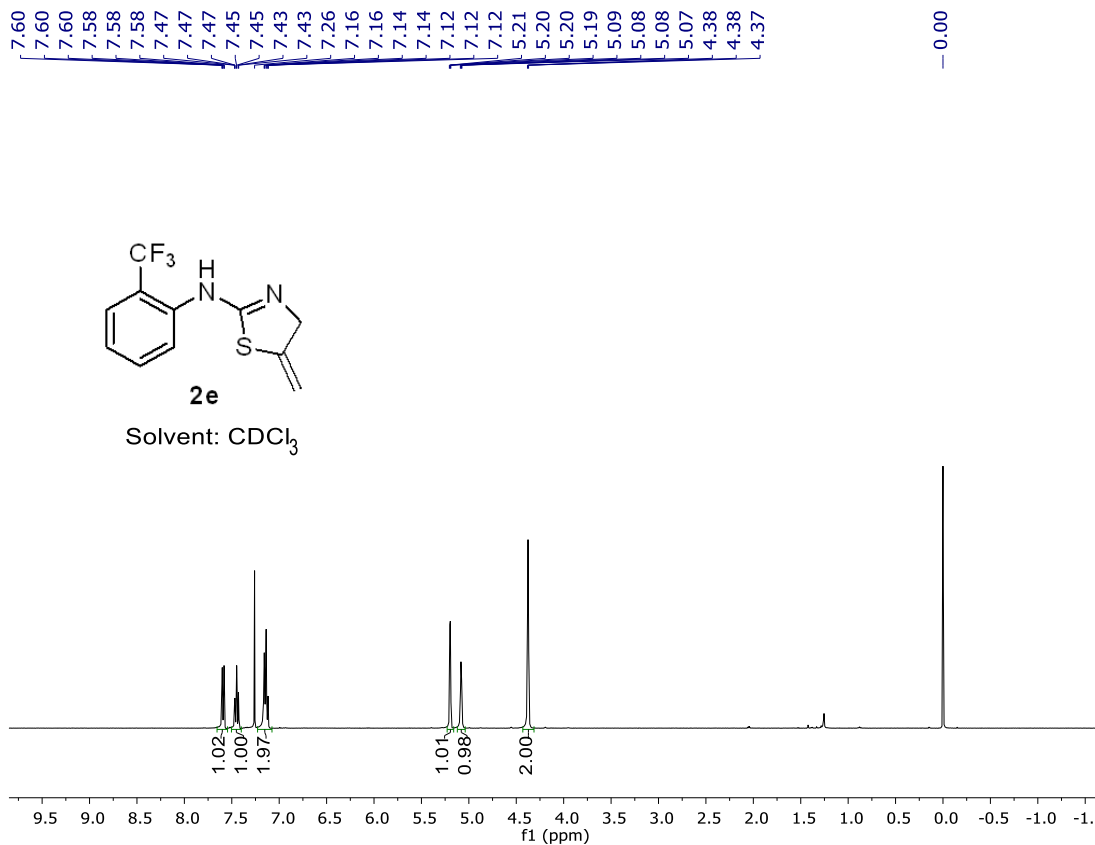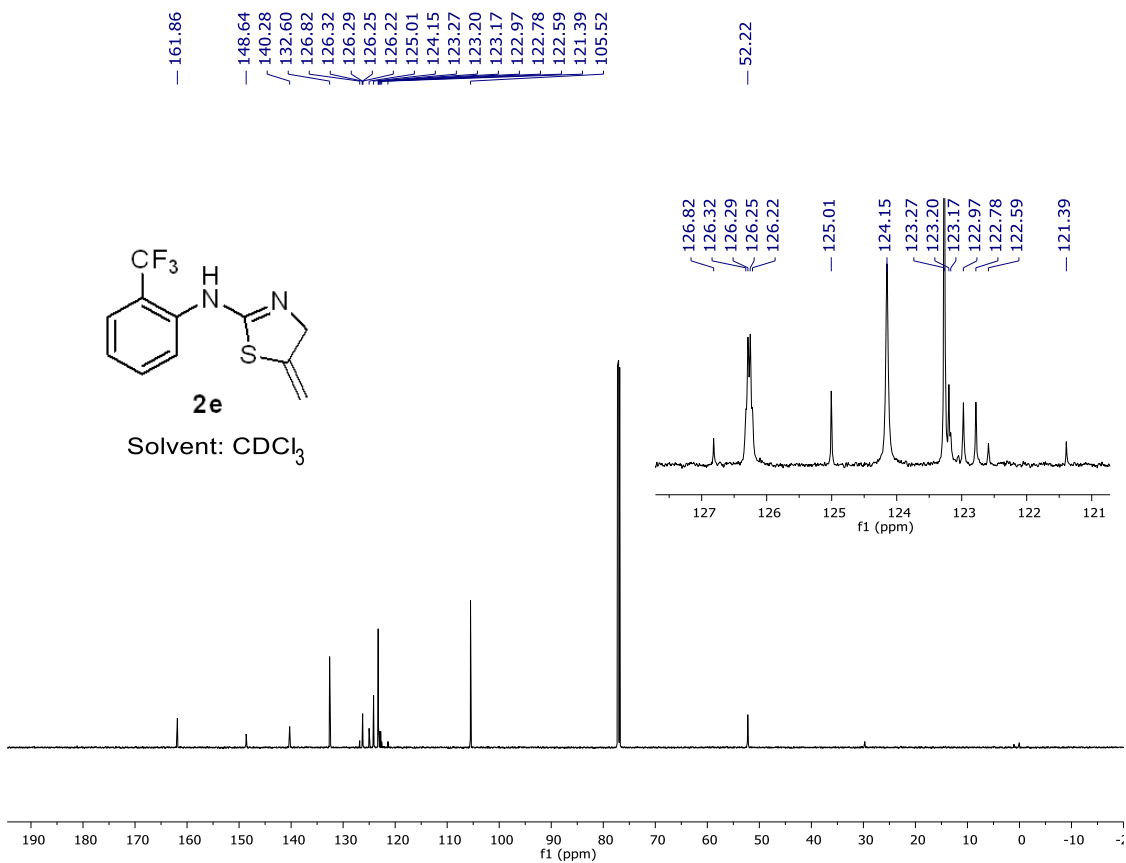

-61.484

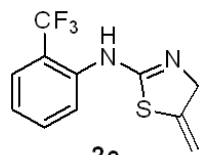

**2e**

Solvent: CDCl<sub>3</sub>

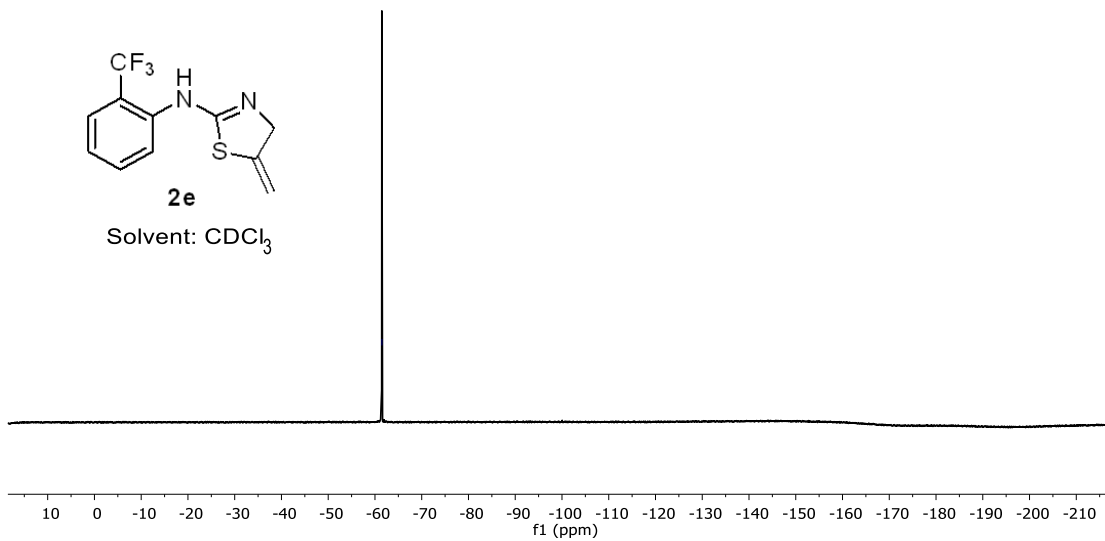

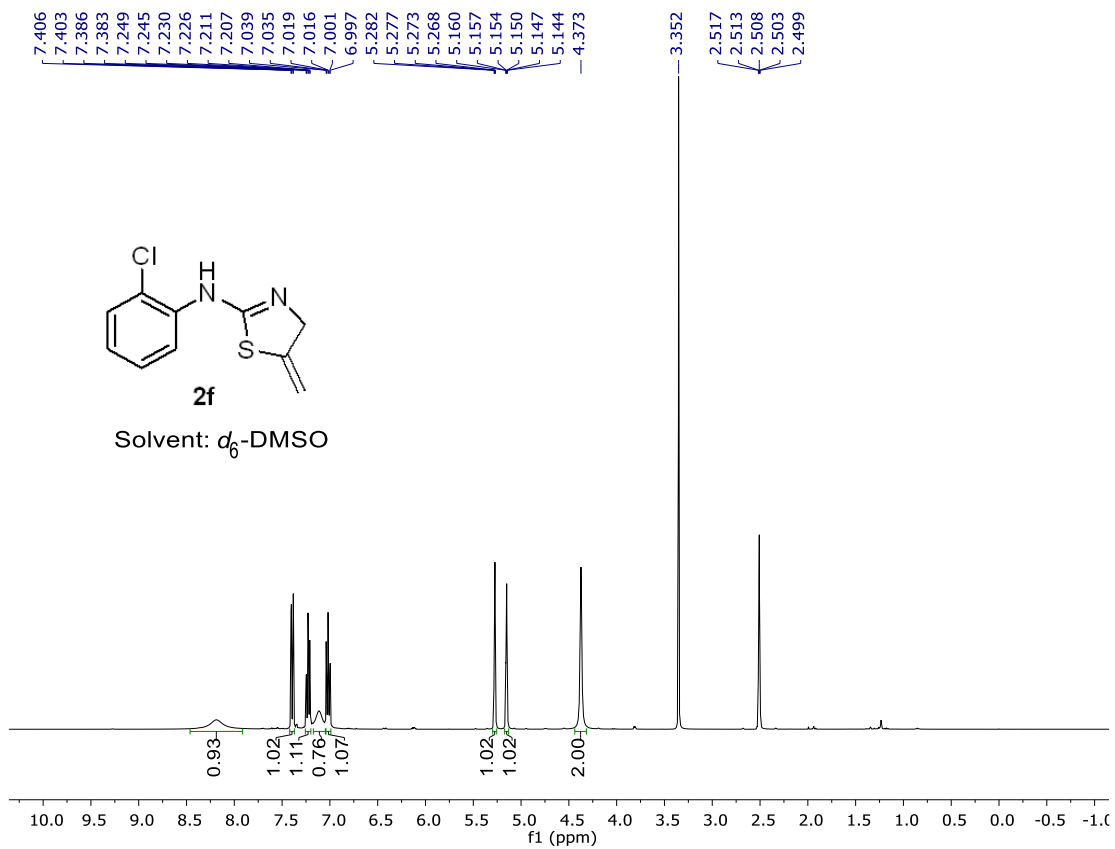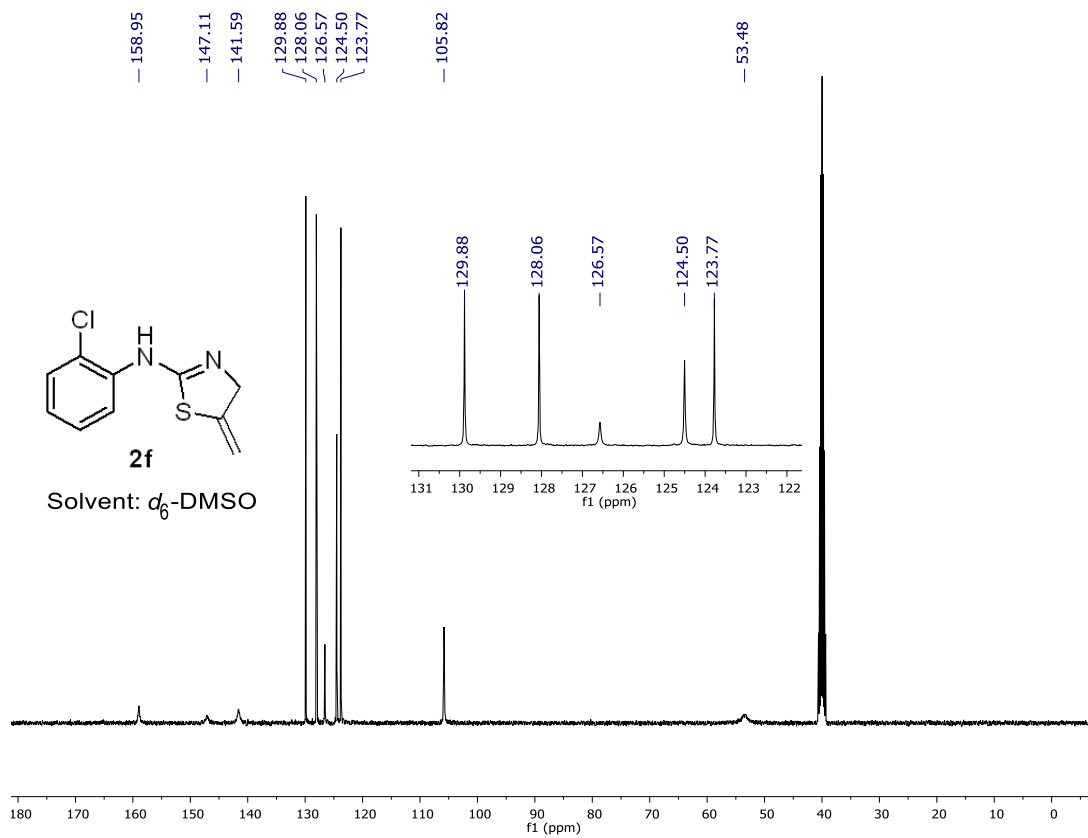

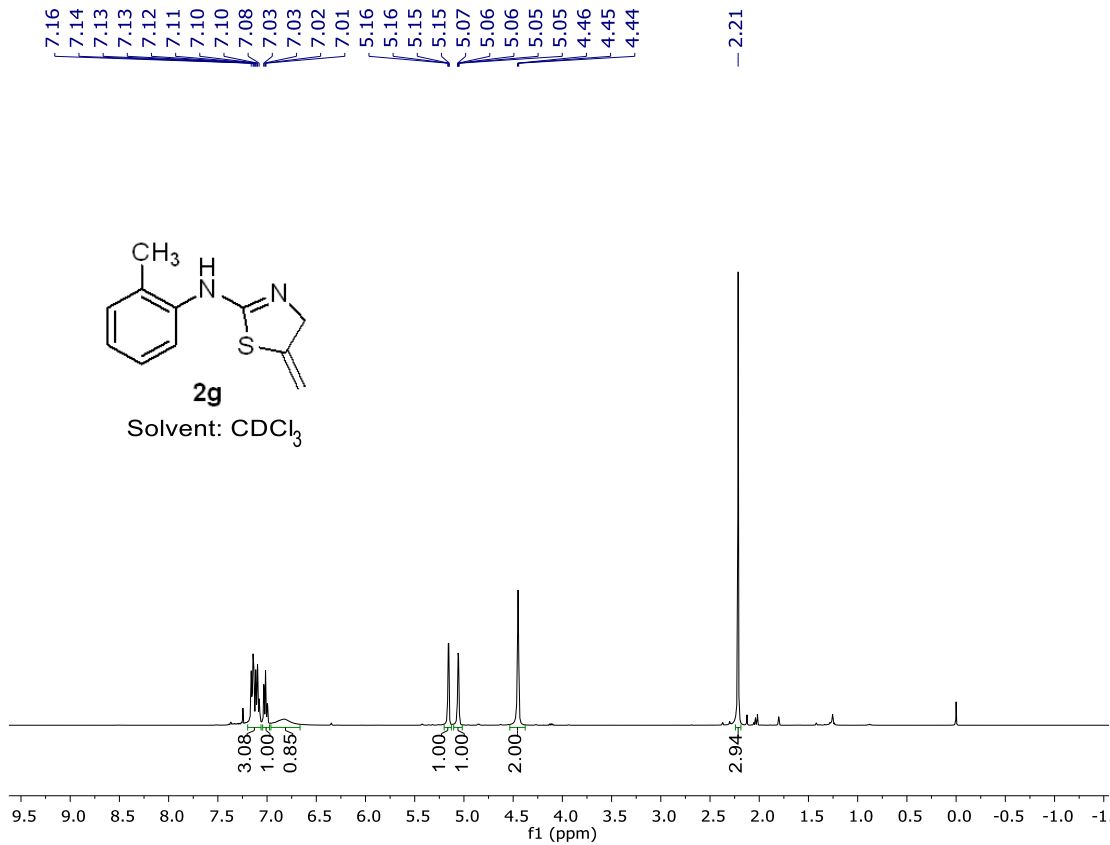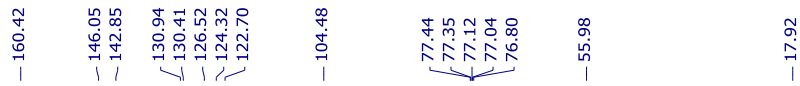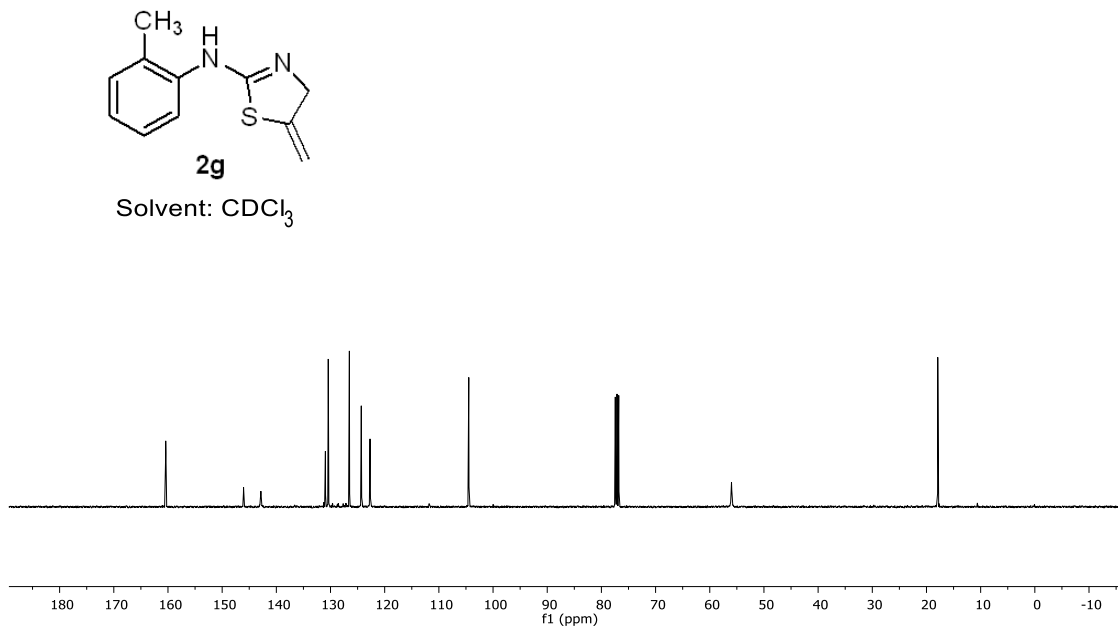

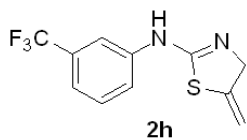

Solvent: CDCl<sub>3</sub>

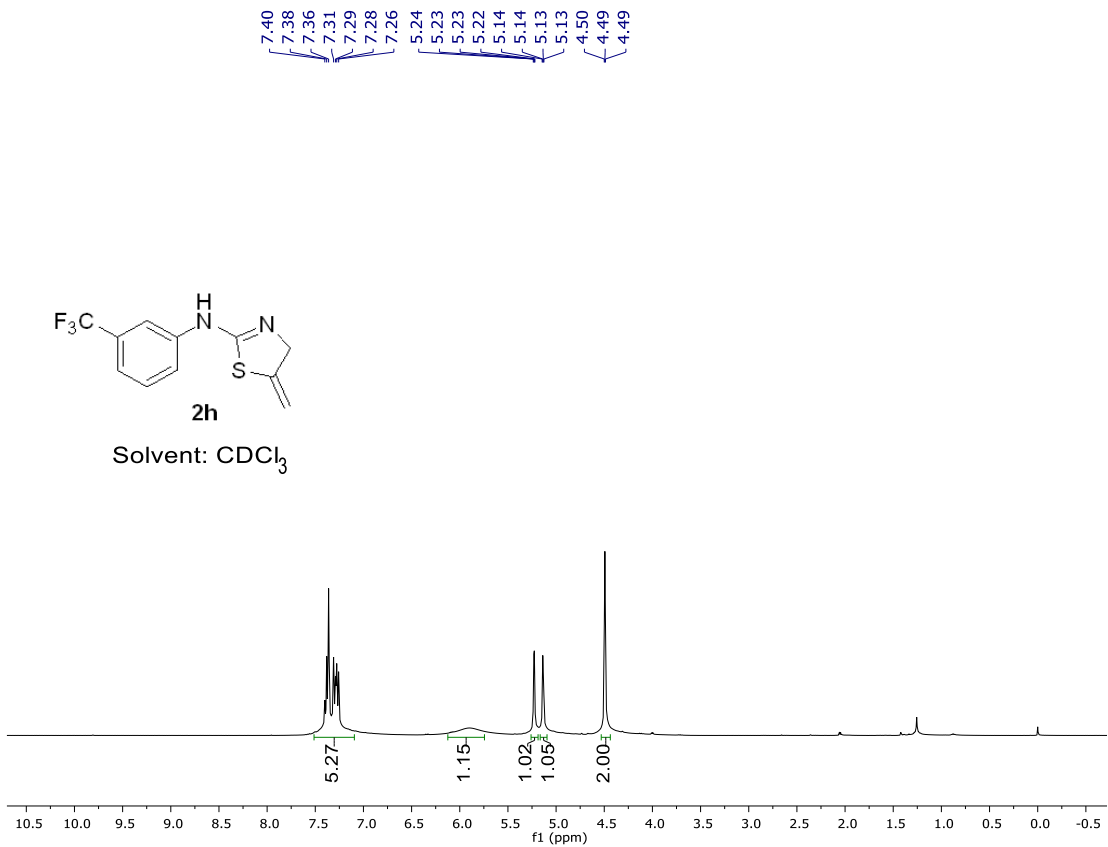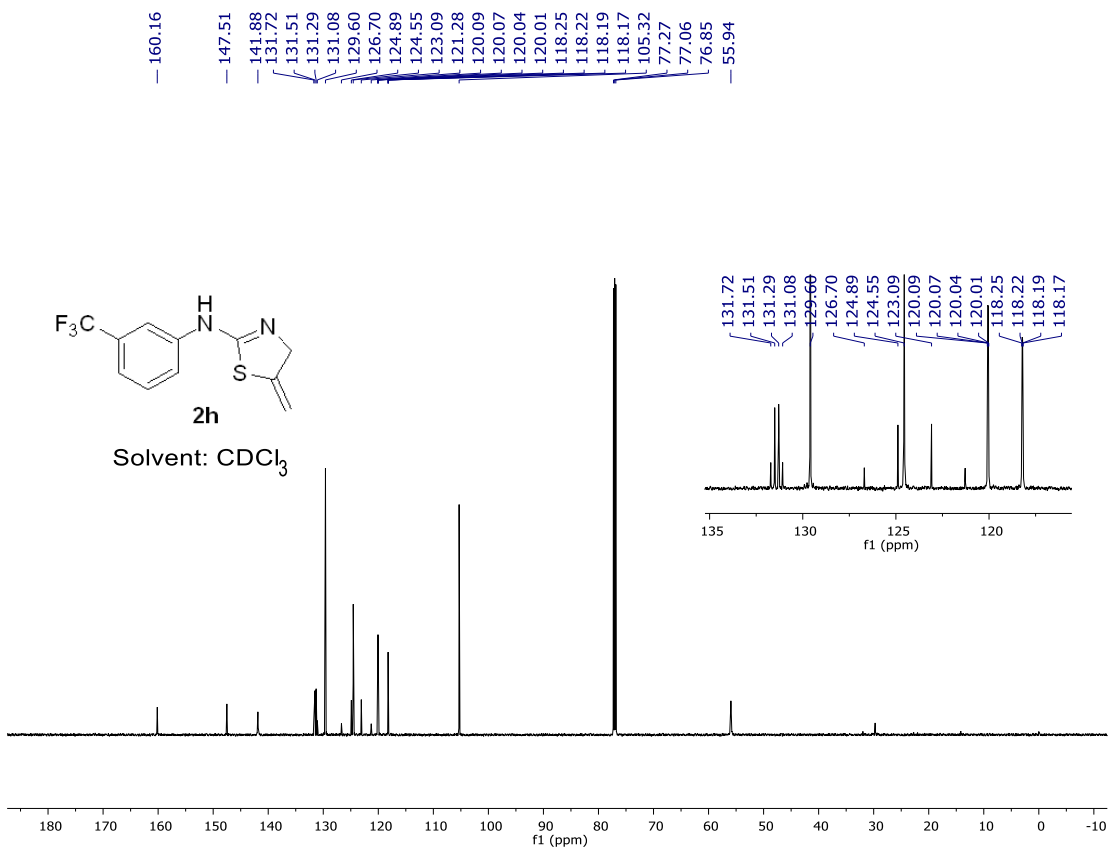

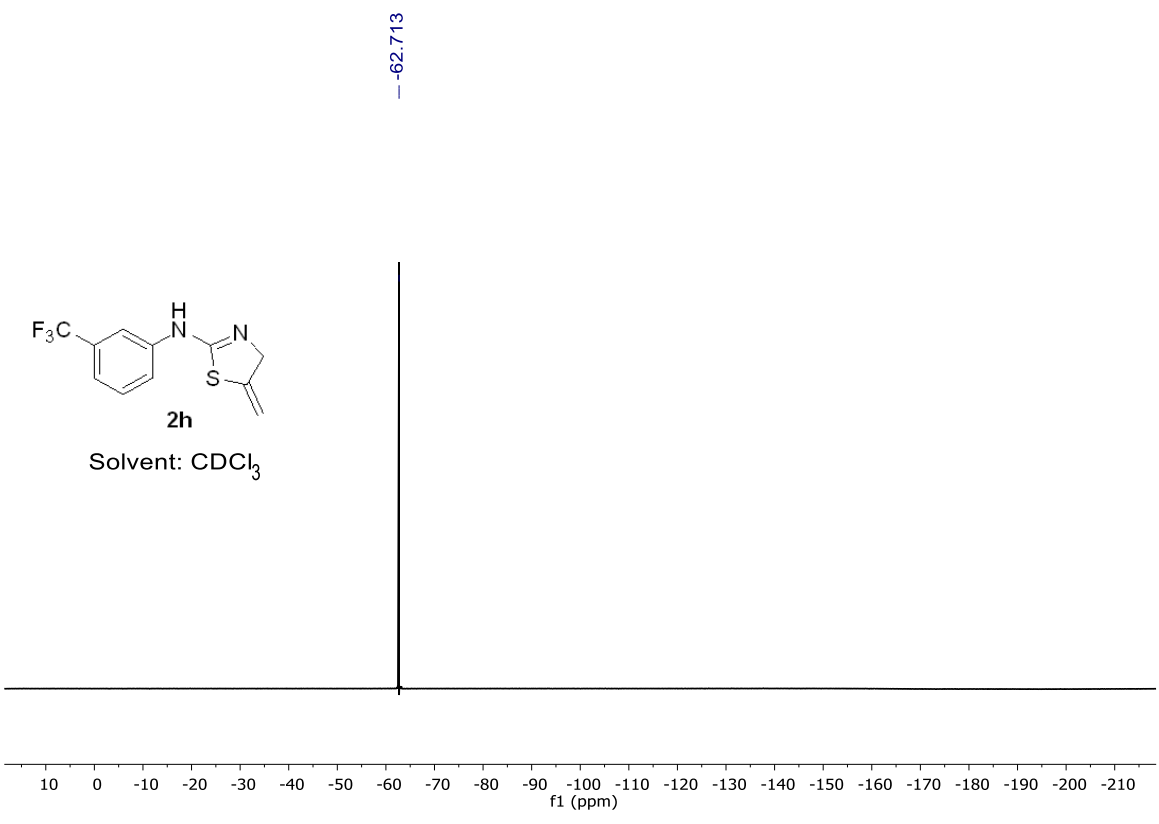

8.15  
8.15  
8.14  
8.13  
7.83  
7.82  
7.81  
7.60  
7.47  
7.47  
7.46  
7.45  
7.45  
7.44  
7.41  
7.39  
7.37  
7.14  
7.12  
5.08  
5.07  
5.07  
5.06  
4.99  
4.99  
4.98  
4.98  
4.24  
4.24  
4.23

— 1.26

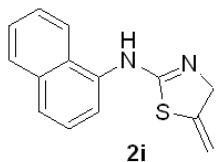

Solvent: CDCl<sub>3</sub>

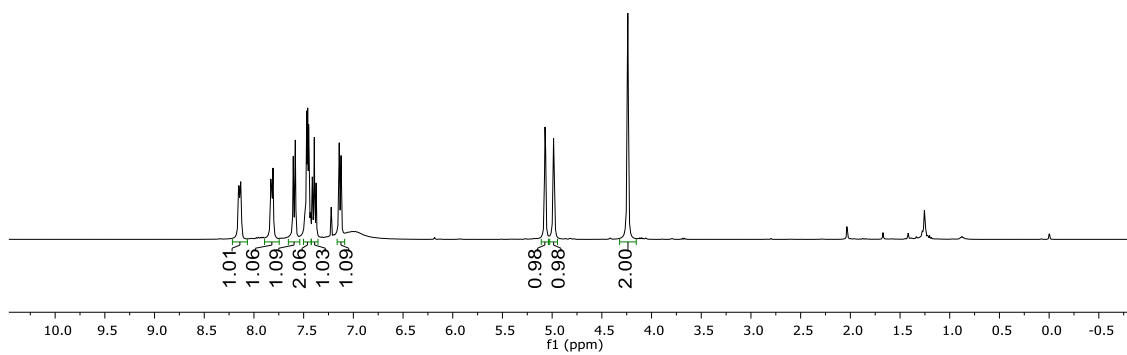

162.33  
146.13  
141.02  
134.35  
128.85  
128.06  
126.21  
125.97  
125.62  
124.06  
123.43  
117.66  
105.21  
77.35  
77.14  
76.93  
52.47

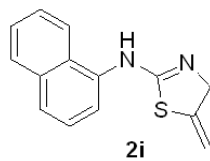

Solvent: CDCl<sub>3</sub>

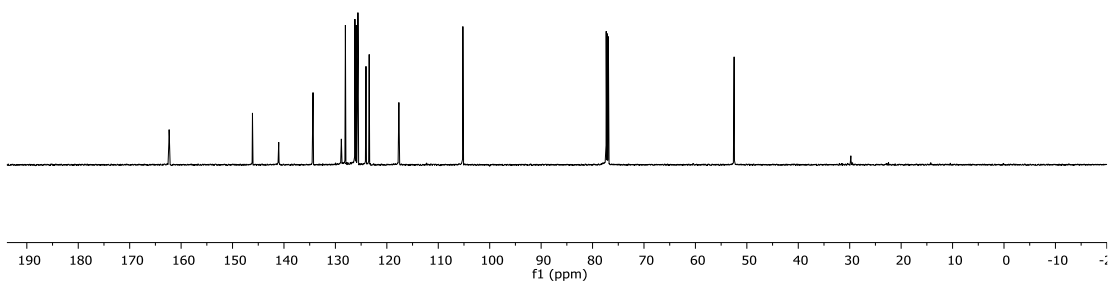

7.32  
7.31  
7.31  
7.30  
7.29  
7.29  
7.27  
7.27  
7.26  
7.26  
7.25  
5.15  
5.14  
5.14  
5.13  
5.13  
5.10  
5.09  
5.09  
5.08  
5.08  
4.66  
4.65  
4.65  
4.64  
4.41  
4.41

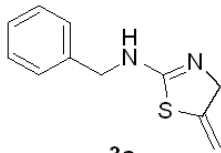

3a

Solvent: CDCl<sub>3</sub>

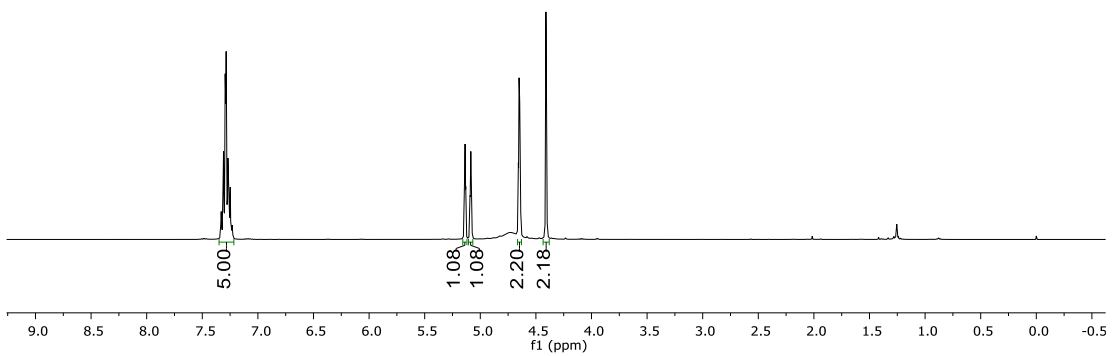

158.66  
148.70  
138.27  
128.66  
127.69  
127.54  
102.50  
77.45  
77.13  
76.82  
66.73  
48.33

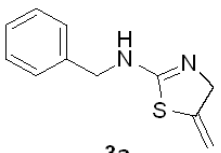

3a

Solvent: CDCl<sub>3</sub>

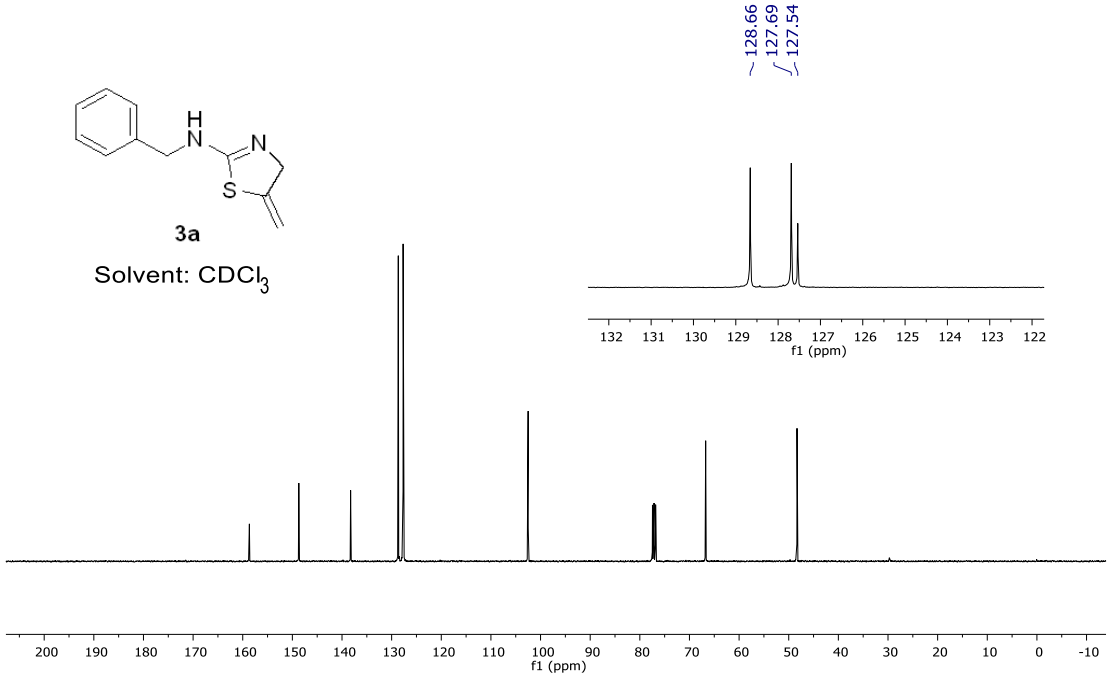



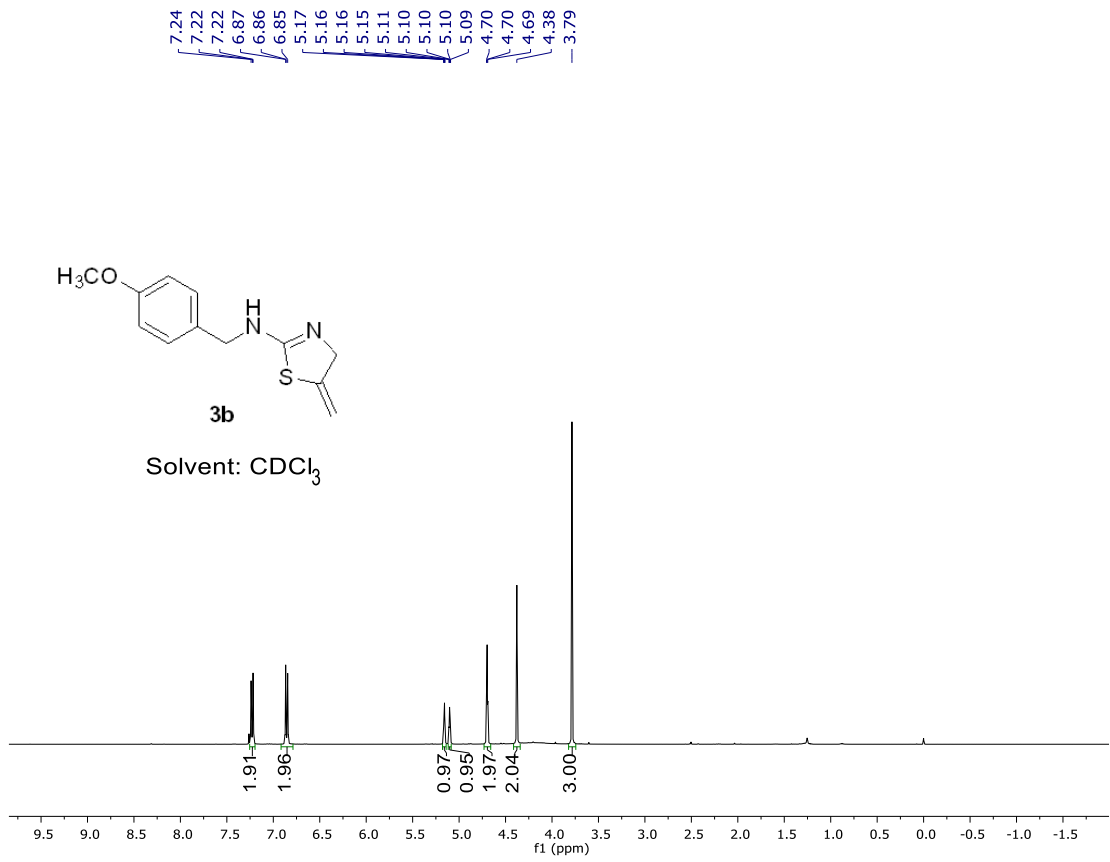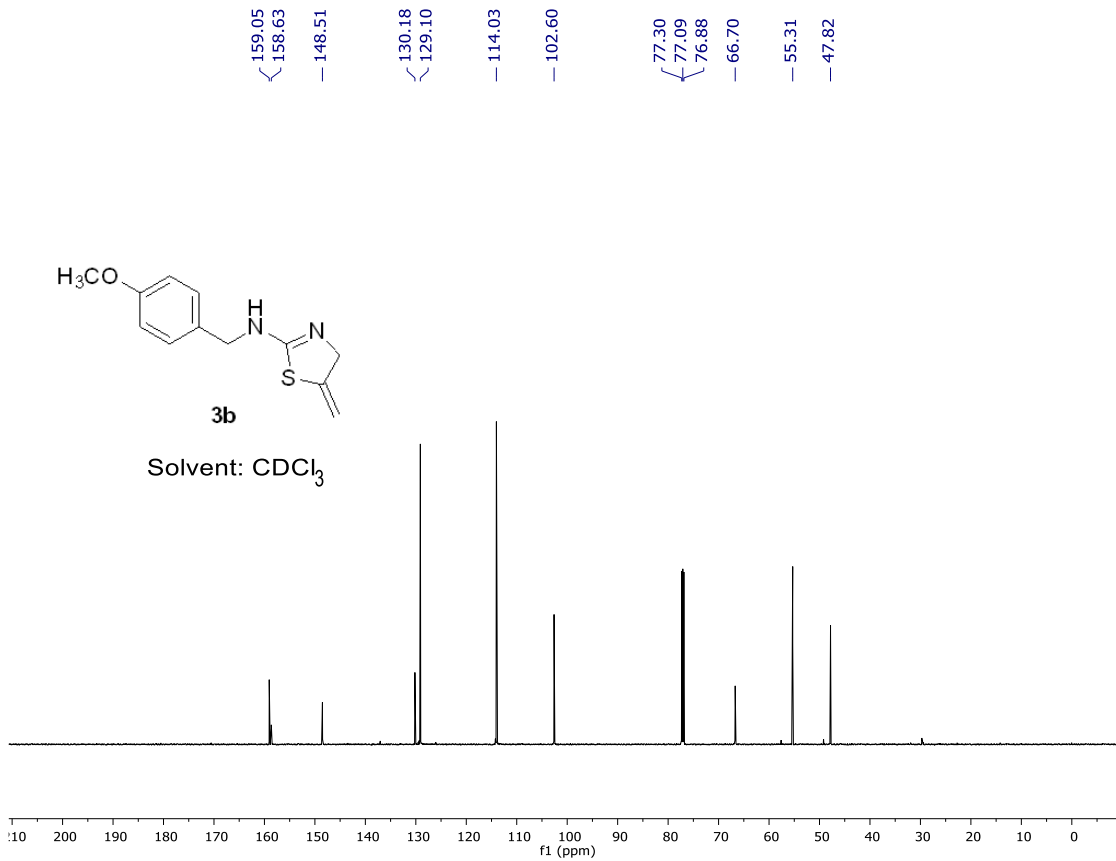

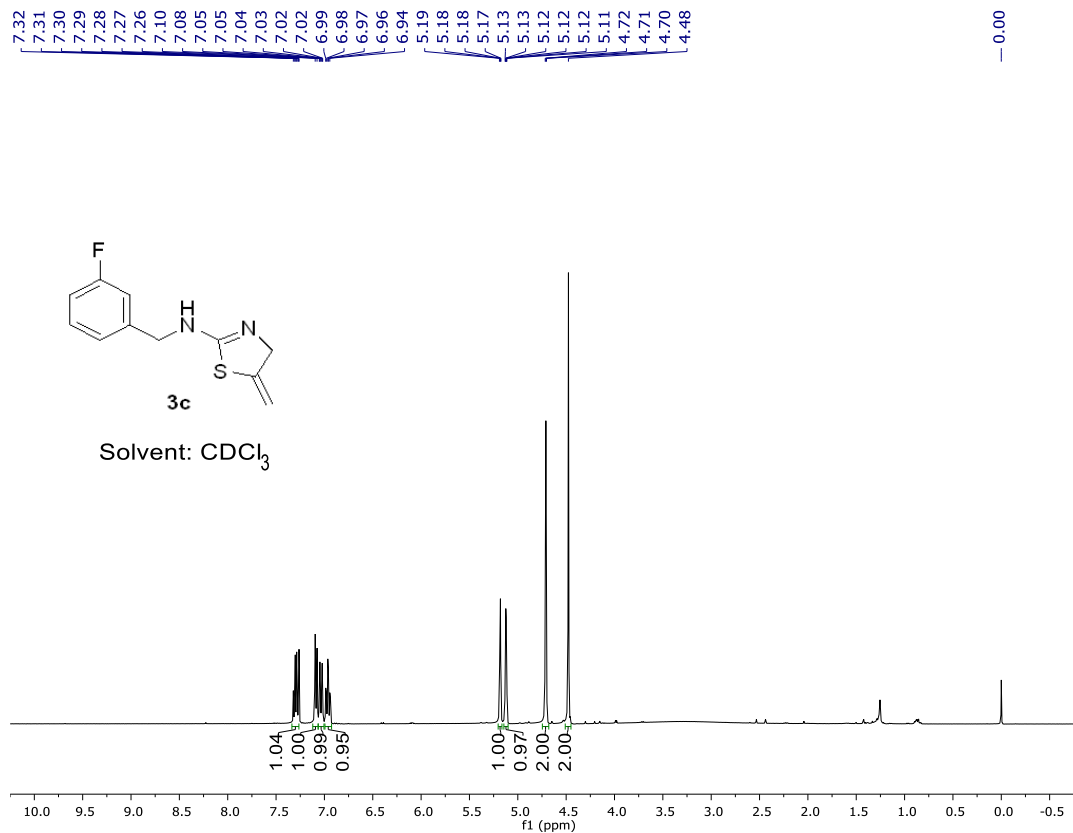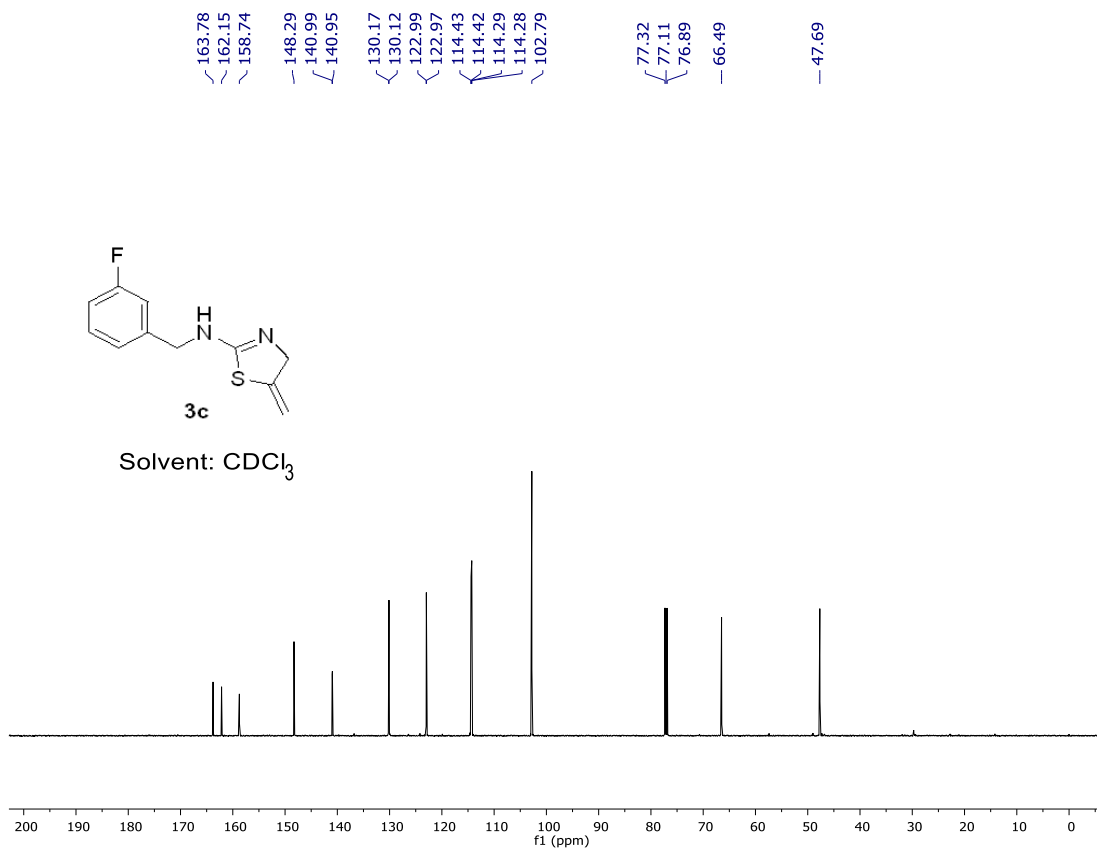

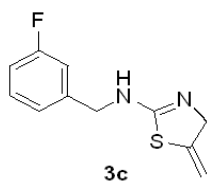

Solvent: CDCl<sub>3</sub>

--113.014

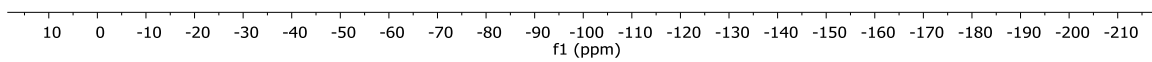

7.32  
7.31  
7.31  
7.30  
7.29  
7.29  
7.28  
7.26  
7.24  
7.24  
7.22  
7.21  
7.20  
7.19  
7.18  
5.17  
5.16  
5.16  
5.16  
5.15  
5.15  
5.11  
5.10  
5.10  
5.09  
5.09  
4.71  
4.70  
4.70  
3.56  
3.55  
3.53  
2.89  
2.88  
2.86

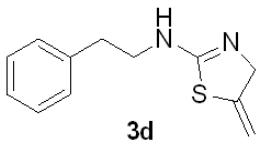

Solvent: CDCl<sub>3</sub>

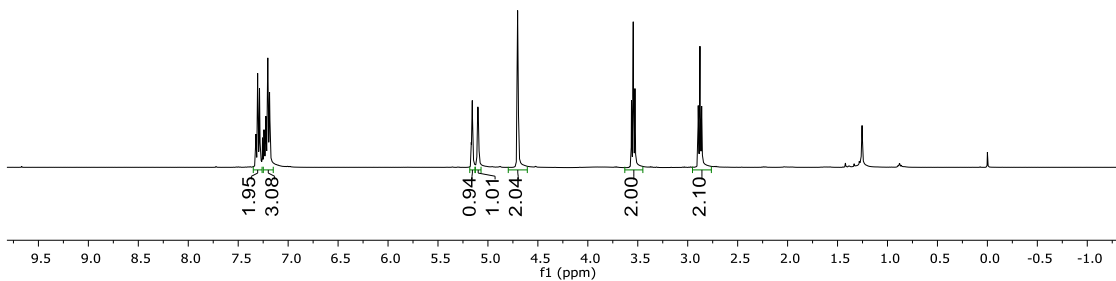

158.43  
148.70  
138.80  
128.84  
128.64  
126.53  
102.40  
77.34  
77.13  
76.92  
66.96  
45.33  
35.73

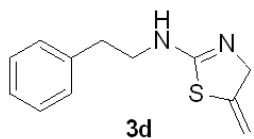

Solvent: CDCl<sub>3</sub>

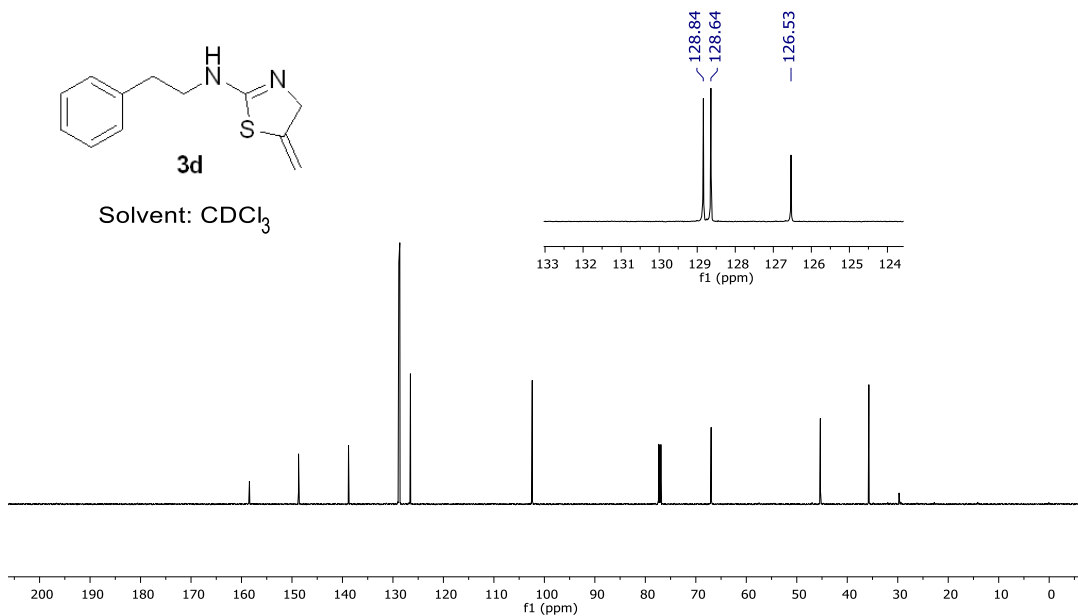

5.16  
5.16  
5.15  
5.14  
5.11  
5.10  
5.10  
5.09  
4.70  
4.69  
3.53  
3.51  
3.50  
3.49  
3.48  
2.06  
2.05  
2.04  
2.03  
2.02  
2.01  
2.00  
1.74  
1.73  
1.72  
1.71  
1.70  
1.69  
1.63  
1.62  
1.61  
1.60  
1.59  
1.40  
1.38  
1.37  
1.36  
1.35  
1.34  
1.33  
1.33  
1.31  
1.30  
1.30  
1.25  
1.21  
1.20  
1.18  
1.17  
1.15  
1.14  
1.12

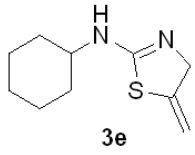

Solvent: CDCl<sub>3</sub>

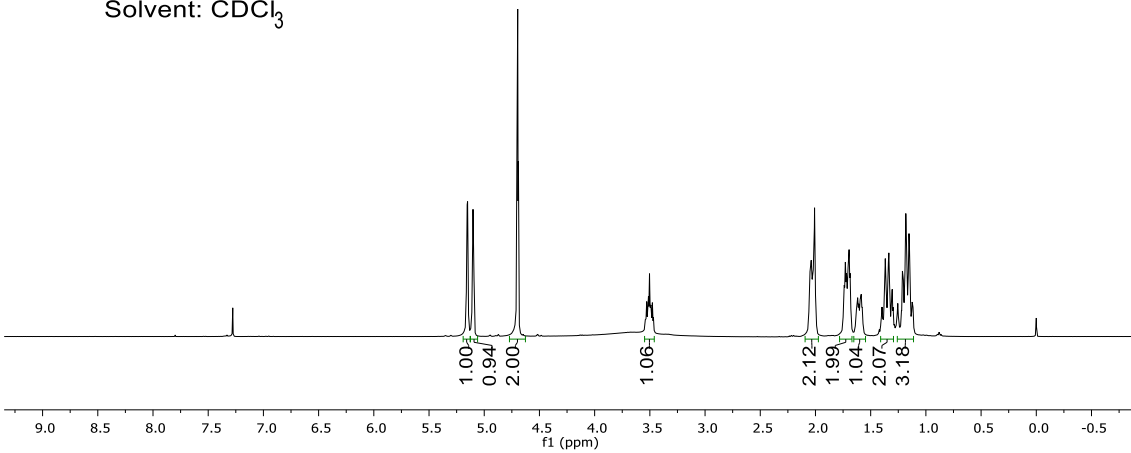

157.63  
148.59  
102.24  
77.28  
77.07  
76.85  
66.94  
53.15  
33.57  
25.56  
24.83

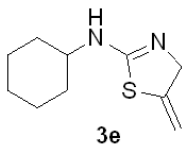

Solvent: CDCl<sub>3</sub>

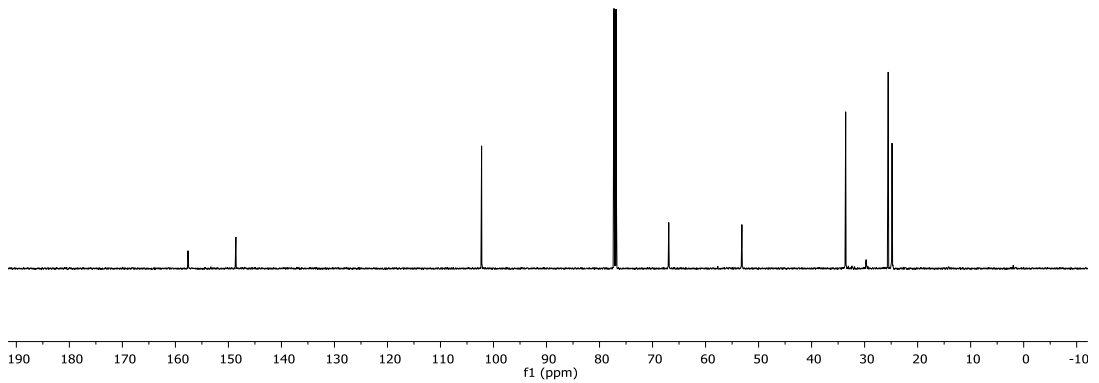

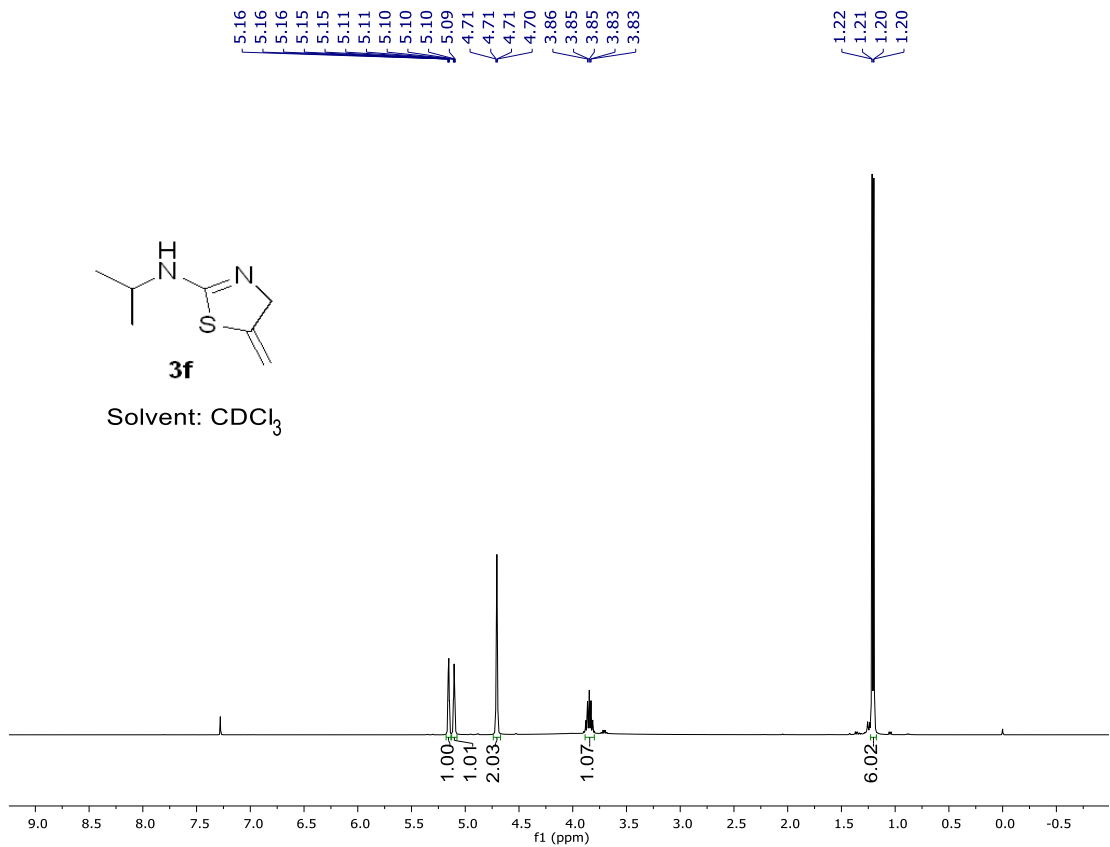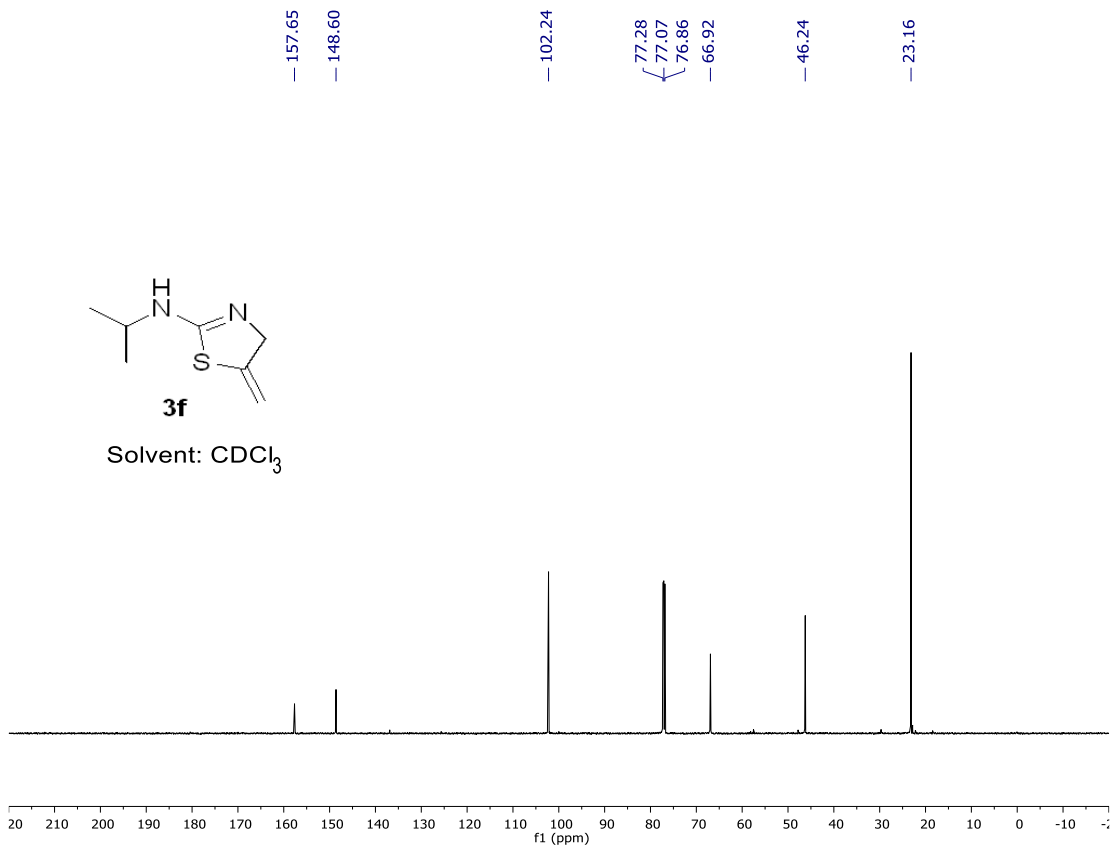

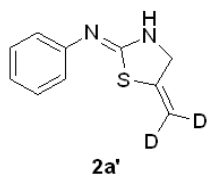

Solvent: CDCl<sub>3</sub>

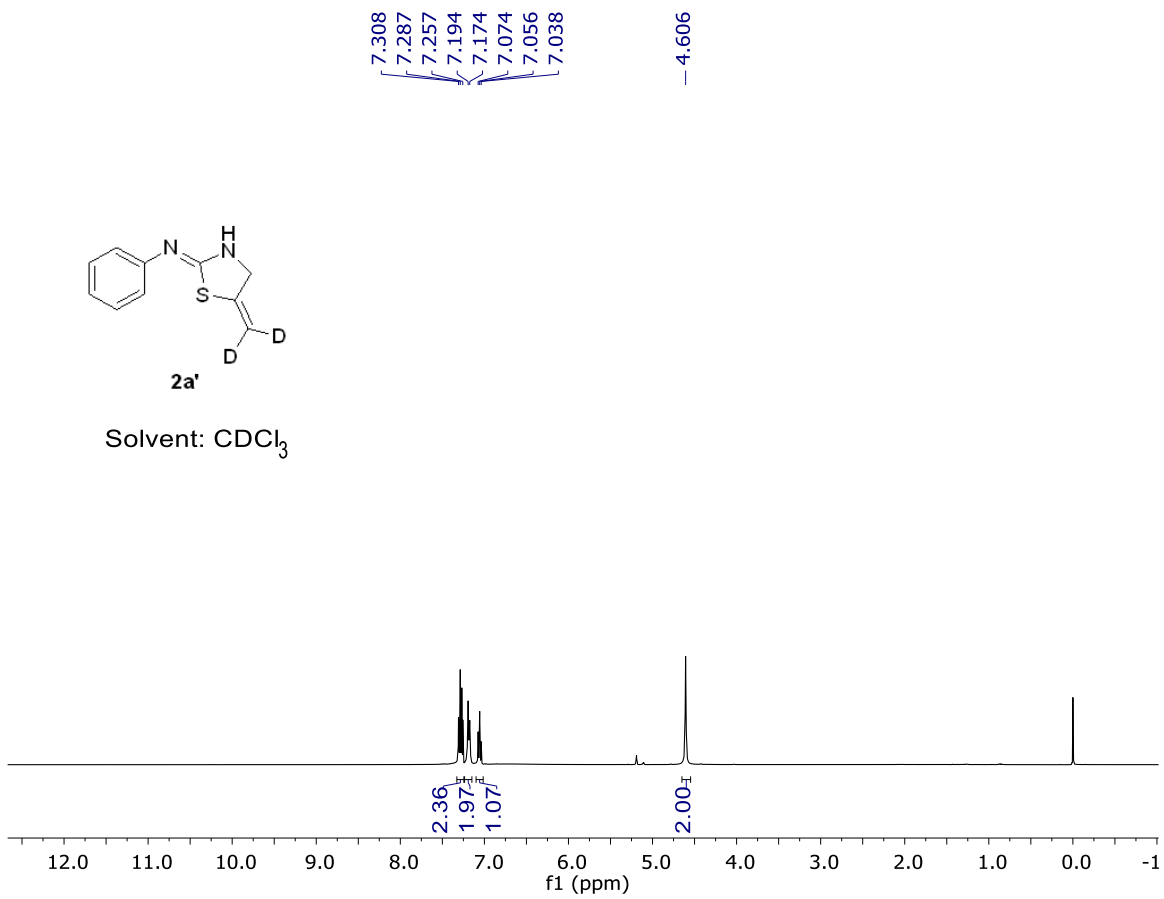

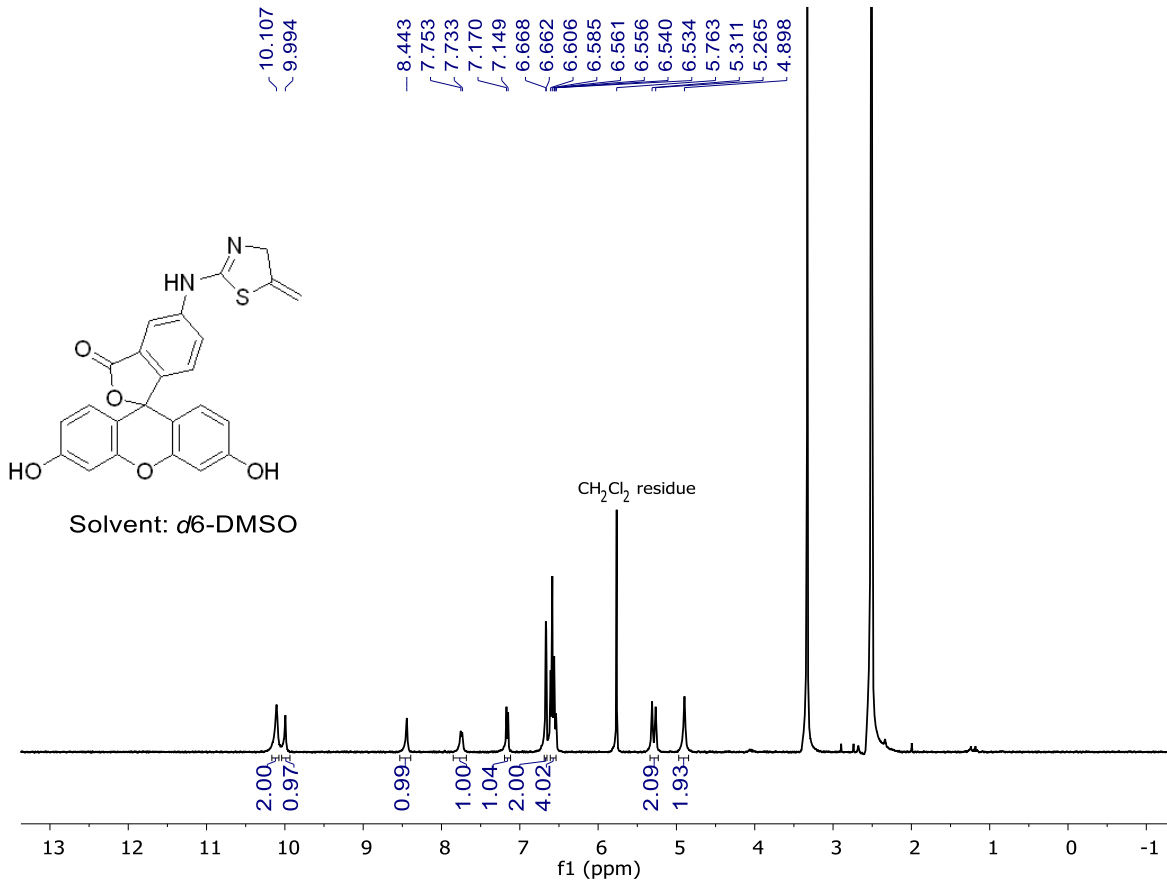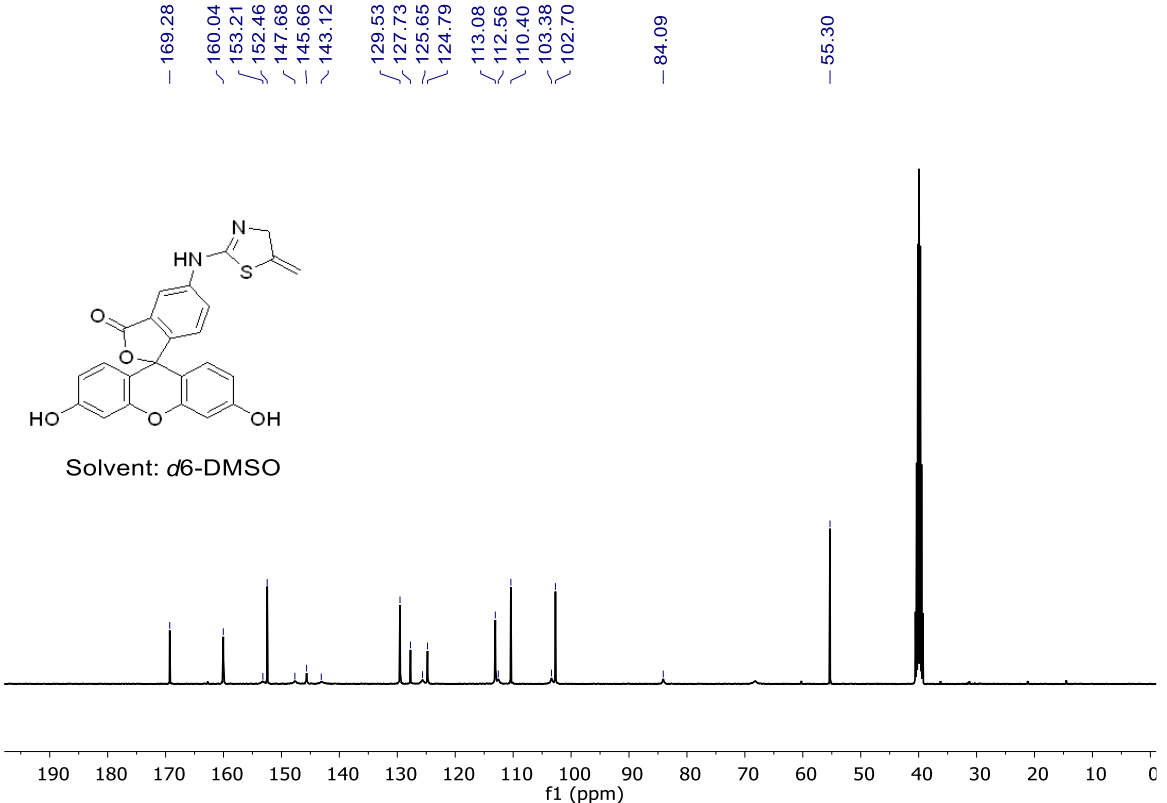

Supplement: d1ob00464f1.pdf [file d1ob00464f1.pdf]
